# Supplementary material for: The Clinical Effectiveness and Cost-Effectiveness of Lamotrigine in Borderline Personality Disorder: A Randomized Placebo-Controlled Trial
Source: Atypon-hosted journal article supplement (doi:10.1176/appi.ajp.2018.17091006), 2018-04-06
Supplement: appi.ajp.2018.17091006.ds001.pdf [file appi.ajp.2018.17091006.ds001.pdf]

Data Supplement for Crawford et al., The Clinical Effectiveness and Cost-Effectiveness of Lamotrigine in Borderline Personality Disorder: A Randomized Placebo-Controlled Trial. Am J Psychiatry (doi: 10.1176/appi.ajp.2018.17091006)

**TABLE S1. Total ZAN-BPD scores at baseline, 12, 24, and 52 weeks**

|                                  | <b>Lamotrigine</b> | <b>Standard deviation</b> | <b>Placebo</b> | <b>Standard deviation</b> |
|----------------------------------|--------------------|---------------------------|----------------|---------------------------|
| <b>ZAN-BPD score at baseline</b> |                    |                           |                |                           |
| Mean                             | 16.6               | 5.8                       | 17.4           | 6.2                       |
| N                                | 135                |                           | 138            |                           |
| <b>ZAN-BPD score at 12 weeks</b> |                    |                           |                |                           |
| Mean                             | 11.5               | 5.7                       | 11.5           | 7.1                       |
| N                                | 111                |                           | 104            |                           |
| <b>ZAN-BPD score at 24 weeks</b> |                    |                           |                |                           |
| Mean                             | 11.9               | 6.1                       | 11.9           | 7.0                       |
| N                                | 98                 |                           | 98             |                           |
| <b>ZAN-BPD score at 52 weeks</b> |                    |                           |                |                           |
| Mean                             | 11.3               | 6.6                       | 11.5           | 7.7                       |
| N                                | 97                 |                           | 98             |                           |

**TABLE S2. Beck Depression Inventory scores at baseline, 12, 24, and 52 weeks**

|                                     | <b>Lamotrigine</b> | <b>Standard deviation</b> | <b>Placebo</b> | <b>Standard deviation</b> |
|-------------------------------------|--------------------|---------------------------|----------------|---------------------------|
| <b>Depression score at baseline</b> |                    |                           |                |                           |
| Mean                                | 39.8               | 11.7                      | 38.4           | 10.2                      |
| N                                   | 135                |                           | 138            |                           |
| <b>Depression score at 12 weeks</b> |                    |                           |                |                           |
| Mean                                | 29.9               | 15.7                      | 29.0           | 14.5                      |
| N                                   | 110                |                           | 104            |                           |
| <b>Depression score at 24 weeks</b> |                    |                           |                |                           |
| Mean                                | 30.7               | 15.1                      | 29.9           | 15.1                      |
| N                                   | 98                 |                           | 97             |                           |
| <b>Depression score at 52 weeks</b> |                    |                           |                |                           |
| Mean                                | 28.8               | 16.1                      | 28.7           | 15.5                      |
| N                                   | 92                 |                           | 88             |                           |

**TABLE S3. Deliberate self-harm at baseline, 12, 24, and 52 weeks**

|                              | <b>Lamotrigine<br/>(N=137)</b> | <b>Placebo<br/>(N=139)</b> |
|------------------------------|--------------------------------|----------------------------|
| <b>Self-harm at baseline</b> |                                |                            |
| No                           | 39 (28%)                       | 51 (37%)                   |
| Yes                          | 96 (70%)                       | 87 (63%)                   |
| Unknown                      | 2 (2%)                         | 1 (<0.5%)                  |
| <b>Self-harm at 12 weeks</b> |                                |                            |
| No                           | 59 (54%)                       | 62 (60%)                   |
| Yes                          | 51 (46%)                       | 41 (40%)                   |
| Unknown                      | 1 (<0.5%)                      | 1 (<0.5%)                  |
| <b>Self-harm at 24 weeks</b> |                                |                            |
| No                           | 56 (57%)                       | 60 (62%)                   |
| Yes                          | 42 (43%)                       | 37 (38%)                   |
| Unknown                      | 0                              | 1 (<0.5%)                  |
| <b>Self-harm at 52 weeks</b> |                                |                            |
| No                           | 46 (47%)                       | 50 (51%)                   |
| Yes                          | 45 (46%)                       | 38 (39%)                   |
| Unknown                      | 6 (7%)                         | 10 (10%)                   |

All data are N (%) unless otherwise indicated.

Denominators are the total number participants who completed the individual follow-up.

**TABLE S4. Social Functioning Questionnaire Scores at baseline, 12, 24, and 52 weeks**

|                                    | <b>Lamotrigine</b> | <b>Standard<br/>deviation</b> | <b>Placebo</b> | <b>Standard<br/>deviation</b> |
|------------------------------------|--------------------|-------------------------------|----------------|-------------------------------|
| <b>Social function at baseline</b> |                    |                               |                |                               |
| Mean                               | 15.0               | 4.1                           | 14.9           | 4.5                           |
| N                                  | 135                |                               | 137            |                               |
| <b>Social function at 12 weeks</b> |                    |                               |                |                               |
| Mean                               | 12.6               | 4.5                           | 12.6           | 5.2                           |
| N                                  | 110                |                               | 104            |                               |
| <b>Social function at 24 weeks</b> |                    |                               |                |                               |
| Mean                               | 11.8               | 4.3                           | 12.2           | 4.9                           |
| N                                  | 98                 |                               | 97             |                               |
| <b>Social function at 52 weeks</b> |                    |                               |                |                               |
| Mean                               | 12.4               | 4.3                           | 12.3           | 4.9                           |
| N                                  | 91                 |                               | 88             |                               |

**TABLE S5. Scores on ZAN-BPD subscales at baseline and 52 weeks**

|                                                | Baseline <sup>^</sup> |                    | 52-week follow-up <sup>^</sup> |                    | *Adjusted difference in means | 95% Confidence interval | p-value |
|------------------------------------------------|-----------------------|--------------------|--------------------------------|--------------------|-------------------------------|-------------------------|---------|
|                                                | Mean                  | Standard deviation | Mean                           | Standard deviation |                               |                         |         |
| <b>ZAN-BPD affective disturbance subscore</b>  |                       |                    |                                |                    |                               |                         |         |
| Lamotrigine                                    | 6.9                   | 2.2                | 4.7                            | 2.8                | -0.1                          | -0.9, 0.7               | 0.850   |
| Placebo                                        | 7.2                   | 2.4                | 4.9                            | 3.1                | —                             |                         |         |
| <b>ZAN-BPD cognitive disturbance subscore</b>  |                       |                    |                                |                    |                               |                         |         |
| Lamotrigine                                    | 4.0                   | 2.0                | 2.7                            | 2.2                | 0.1                           | -0.4, 0.7               | 0.615   |
| Placebo                                        | 4.3                   | 2.0                | 2.6                            | 2.1                | —                             |                         |         |
| <b>ZAN-BPD impulsivity subscore</b>            |                       |                    |                                |                    |                               |                         |         |
| Lamotrigine                                    | 3.0                   | 2.1                | 2.1                            | 2.0                | -0.1                          | -0.6, 0.5               | 0.824   |
| Placebo                                        | 3.0                   | 1.8                | 2.1                            | 2.1                | —                             |                         |         |
| <b>ZAN-BPD disturbed relationship subscore</b> |                       |                    |                                |                    |                               |                         |         |
| Lamotrigine                                    | 2.7                   | 1.9                | 1.7                            | 1.8                | 0                             | -0.5, 0.5               | 0.982   |
| Placebo                                        | 2.9                   | 2.0                | 1.8                            | 2.0                | —                             |                         |         |

\*Adjusted by site, baseline ZAN-BPD score, severity of personality disorder and extent of bipolarity.

<sup>^</sup> Data from 195 participants were included in the primary analysis model.
